# Supplementary material for: Surface friction alters the agility of a small Australian marsupial
Source: Oxford University Press journal article supplement (doi:10.1242/jeb.172544), 2018-01-01
Supplement: jeb172544supp.pdf [file jeb172544supp.pdf]

## SUPPLEMENTARY INFORMATION

**Table S1: Morphological dimensions of a subset of female buff-footed antechinus used in this study ( $n = 12$ ).**

| Length         | M $\pm$ SE (mm)  |
|----------------|------------------|
| Head           | 30.25 $\pm$ 0.15 |
| Body           | 64.09 $\pm$ 1.02 |
| Tail           | 83.80 $\pm$ 1.17 |
| Left forelimb  | 20.69 $\pm$ 0.13 |
| Left hind limb | 25.06 $\pm$ 0.12 |
| Left forefoot  | 10.57 $\pm$ 0.19 |
| Left hind foot | 16.21 $\pm$ 0.14 |

Measurements were head length (nuchal crest to tip of snout), body length (nuchal crest to base of tail), tail length (base to tip of tail), left forelimb length (radius-ulna), left hind limb length (tibia-fibula), and left forefoot and hind foot lengths (heel to claw base).

**Table S2. Ranking of *ln* turning radius LMMs based on the likelihood of being the best model.**

| Response: <i>ln</i> turning radius                                                                                                                                                                                                               | <i>df</i> | <i>logLik</i> | <i>AIC<sub>C</sub></i> | $\Delta AIC_C$ | <i>w</i> |
|--------------------------------------------------------------------------------------------------------------------------------------------------------------------------------------------------------------------------------------------------|-----------|---------------|------------------------|----------------|----------|
| <i>Model</i>                                                                                                                                                                                                                                     |           |               |                        |                |          |
| 1. <i>ln</i> pre-turn speed + friction + shelter orientation + ( <i>ln</i> pre-turn speed · friction) + ( <i>ln</i> pre-turn speed · shelter orientation)                                                                                        | 8         | -173.726      | 364.5                  | 0              | 0.344    |
| 2. <i>ln</i> pre-turn speed + friction + shelter orientation + <i>ln</i> mass + ( <i>ln</i> pre-turn speed · friction) + ( <i>ln</i> pre-turn speed · shelter orientation)                                                                       | 9         | -172.606      | 364.5                  | 0.024          | 0.340    |
| 3. <i>ln</i> pre-turn speed + friction + shelter orientation + ( <i>ln</i> pre-turn speed · shelter orientation)                                                                                                                                 | 7         | -176.303      | 367.4                  | 2.925          | 0.080    |
| 4. <i>ln</i> pre-turn speed + friction + shelter orientation + <i>ln</i> mass + ( <i>ln</i> pre-turn speed · shelter orientation)                                                                                                                | 8         | -175.300      | 367.6                  | 3.148          | 0.071    |
| 5. <i>ln</i> pre-turn speed + friction + shelter orientation                                                                                                                                                                                     | 6         | -177.900      | 368.4                  | 3.919          | 0.049    |
| 6. <i>ln</i> pre-turn speed + friction + shelter orientation + <i>ln</i> mass                                                                                                                                                                    | 7         | -176.976      | 368.7                  | 4.271          | 0.041    |
| 7. <i>ln</i> pre-turn speed + friction + shelter orientation + ( <i>ln</i> pre-turn speed · friction)                                                                                                                                            | 7         | -177.402      | 369.6                  | 5.123          | 0.027    |
| 8. <i>ln</i> pre-turn speed + friction + shelter orientation + <i>ln</i> mass + ( <i>ln</i> pre-turn speed · friction)                                                                                                                           | 8         | -176.465      | 370.0                  | 5.480          | 0.022    |
| <b>Full model (ranked 22<sup>nd</sup>).</b> <i>ln</i> pre-turn speed + friction + shelter orientation + <i>ln</i> mass + trial + ( <i>ln</i> pre-turn speed · friction) + ( <i>ln</i> pre-turn speed · shelter orientation) + (friction · trial) | 11        | -177.557      | 379.0                  | 14.549         | 2E-4     |
| <b>Null model (ranked 59<sup>th</sup>).</b> intercept only                                                                                                                                                                                       | 3         | -211.192      | 428.6                  | 64.081         | 4E-15    |

*w* is the Akaike weight, which equals the probability that the model describes the data better than the other models. Only models with an Akaike weight of at least 1% are listed, in addition to the full model and the null model. In addition to their fixed effects, all models contain individual as a random effect. Continuous variables were *ln* transformed to satisfy the assumption of linearity.

**Table S3. Ranking of  $\ln$  turning speed LMMs based on the likelihood of being the best model.**

| Response: $\ln$ turning speed                                                                                                                                                                                                                                                                                                                                                            | <i>df</i> | <i>logLik</i> | <i>AIC<sub>C</sub></i> | $\Delta AIC_C$ | <i>w</i> |
|------------------------------------------------------------------------------------------------------------------------------------------------------------------------------------------------------------------------------------------------------------------------------------------------------------------------------------------------------------------------------------------|-----------|---------------|------------------------|----------------|----------|
| <i>Model</i>                                                                                                                                                                                                                                                                                                                                                                             |           |               |                        |                |          |
| 1. $\ln$ turning radius + $\ln$ pre-turn speed + friction                                                                                                                                                                                                                                                                                                                                | 6         | 83.832        | -155.1                 | 0              | 0.713    |
| 2. $\ln$ turning radius + $\ln$ pre-turn speed + friction + $\ln$ mass                                                                                                                                                                                                                                                                                                                   | 7         | 82.630        | -150.5                 | 4.605          | 0.071    |
| 3. $\ln$ turning radius + $\ln$ pre-turn speed + friction + ( $\ln$ pre-turn speed $\cdot$ friction)                                                                                                                                                                                                                                                                                     | 7         | 82.540        | -150.3                 | 4.784          | 0.065    |
| 4. $\ln$ turning radius + $\ln$ pre-turn speed + friction + ( $\ln$ turning radius $\cdot$ $\ln$ pre-turn speed)                                                                                                                                                                                                                                                                         | 7         | 82.222        | -149.7                 | 5.421          | 0.047    |
| 5. $\ln$ turning radius + $\ln$ pre-turn speed                                                                                                                                                                                                                                                                                                                                           | 5         | 79.402        | -148.4                 | 6.692          | 0.025    |
| 6. $\ln$ turning radius + $\ln$ pre-turn speed + friction + shelter orientation                                                                                                                                                                                                                                                                                                          | 7         | 81.377        | -148.0                 | 7.110          | 0.020    |
| 7. $\ln$ turning radius + $\ln$ pre-turn speed + friction + shelter orientation + ( $\ln$ turning radius $\cdot$ shelter orientation)                                                                                                                                                                                                                                                    | 8         | 82.089        | -147.2                 | 7.918          | 0.014    |
| <b>Full model (ranked 160<sup>th</sup>)</b> . $\ln$ turning radius + $\ln$ pre-turn speed + friction + shelter orientation + $\ln$ mass + trial + ( $\ln$ turning radius $\cdot$ $\ln$ pre-turn speed) + ( $\ln$ turning radius $\cdot$ shelter orientation) + ( $\ln$ pre-turn speed $\cdot$ friction) + ( $\ln$ pre-turn speed $\cdot$ shelter orientation) + (friction $\cdot$ trial) | 14        | 68.571        | -106.1                 | 49.028         | 2E-11    |
| <b>Null model (ranked 252<sup>nd</sup>)</b> . intercept only                                                                                                                                                                                                                                                                                                                             | 3         | -52.964       | 112.1                  | 267.123        | 7E-59    |

*w* is the Akaike weight, which equals the probability that the model describes the data better than the other models. Only models with an Akaike weight of at least 1% are listed, in addition to the full model and the null model. In addition to their fixed effects, all models contain individual as a random effect. Continuous variables were  $\ln$  transformed to satisfy the assumption of linearity.

**Table S4. Ranking of presence of a slip GLMMs based on the likelihood of being the best model.**

| Response: presence of a slip                                                                                                                                                                                                                                                                                                                                                                                                                                                                                    | <i>df</i> | <i>logLik</i> | <i>AIC<sub>C</sub></i> | $\Delta AIC_C$ | <i>w</i> |
|-----------------------------------------------------------------------------------------------------------------------------------------------------------------------------------------------------------------------------------------------------------------------------------------------------------------------------------------------------------------------------------------------------------------------------------------------------------------------------------------------------------------|-----------|---------------|------------------------|----------------|----------|
| <i>Model</i>                                                                                                                                                                                                                                                                                                                                                                                                                                                                                                    |           |               |                        |                |          |
| <b>1.</b> turning speed + pre-turn speed + friction + shelter orientation + trial + (friction · trial)                                                                                                                                                                                                                                                                                                                                                                                                          | 8         | -56.315       | 129.6                  | 0.00           | 0.014    |
| <b>Full model (ranked 6367<sup>th</sup>).</b> turning angle + turning speed + turning radius + pre-turn speed + friction + shelter orientation + trial + mass + (turning angle · shelter orientation) + (turning speed · turning radius) + (turning speed · pre-turn speed) + (turning speed · friction) + (turning radius · pre-turn speed) + (turning radius · friction) + (turning radius · shelter orientation) + (pre-turn speed · friction) + (pre-turn speed · shelter orientation) + (friction · trial) | 20        | -51.412       | 149.3                  | 19.64          | 8E-7     |
| <b>Null model (ranked 7834<sup>th</sup>).</b> intercept only                                                                                                                                                                                                                                                                                                                                                                                                                                                    | 2         | -103.488      | 211.1                  | 81.41          | 3E-20    |

*w* is the Akaike weight, which equals the probability that the model describes the data better than the other models. Only models with an Akaike weight of at least 1% are listed, in addition to the full model and the null model. In addition to their fixed effects, all models contain individual as a random effect.

**Table S5. Ranking of arcsine square root proportion of turning strides with a slip LMMs based on the likelihood of being the best model.**

| Response: arcsine square root proportion of turning strides with a slip                                                                     | <i>df</i> | <i>logLik</i> | <i>AIC<sub>C</sub></i> | $\Delta AIC_C$ | <i>weight</i> |
|---------------------------------------------------------------------------------------------------------------------------------------------|-----------|---------------|------------------------|----------------|---------------|
| <i>Model</i>                                                                                                                                |           |               |                        |                |               |
| 1. turning radius + friction                                                                                                                | 5         | -35.793       | 82.6                   | 0.00           | 0.251         |
| 2. turning radius + friction + (turning radius · friction)                                                                                  | 6         | -35.170       | 83.7                   | 1.17           | 0.140         |
| 3. turning radius + pre-turn speed + friction                                                                                               | 6         | -36.316       | 86.0                   | 3.46           | 0.044         |
| 4. turning speed + turning radius + friction                                                                                                | 6         | -36.336       | 86.1                   | 3.50           | 0.044         |
| 5. turning speed + turning radius + friction + (turning speed · turning radius)                                                             | 7         | -35.201       | 86.3                   | 3.730          | 0.039         |
| 6. turning radius + pre-turn speed + friction + (pre-turn speed · turning radius)                                                           | 7         | -35.443       | 86.8                   | 4.214          | 0.031         |
| 7. turning speed + turning radius + friction + (turning radius · friction)                                                                  | 7         | -35.680       | 87.3                   | 4.689          | 0.024         |
| 8. turning radius + pre-turn speed + friction + (turning radius · friction)                                                                 | 7         | -35.717       | 87.3                   | 4.762          | 0.023         |
| 9. turning radius + friction + shelter orientation                                                                                          | 6         | -36.970       | 87.3                   | 4.770          | 0.023         |
| 10. turning speed + turning radius + friction + (turning speed · turning radius) + (turning radius · friction)                              | 8         | -34.563       | 87.6                   | 5.039          | 0.020         |
| 11. turning radius + friction + trial                                                                                                       | 6         | -37.252       | 87.9                   | 5.334          | 0.017         |
| 12. turning radius + pre-turn speed + friction + (pre-turn speed · turning radius) + (turning radius · friction)                            | 8         | -34.846       | 88.2                   | 5.605          | 0.015         |
| 13. turning speed + turning radius + friction + (turning speed · friction) + (turning radius · friction)                                    | 8         | -34.849       | 88.2                   | 5.610          | 0.015         |
| 14. turning radius + friction + shelter orientation + (turning radius · shelter orientation)                                                | 7         | -36.157       | 88.2                   | 5.643          | 0.015         |
| 15. turning radius + pre-turn speed + friction + (pre-turn speed · friction)                                                                | 7         | -36.194       | 88.3                   | 5.716          | 0.014         |
| 16. turning radius + friction + shelter orientation + (turning radius · friction)                                                           | 7         | -36.330       | 88.6                   | 5.988          | 0.013         |
| 17. turning speed + turning radius + friction + (turning speed · turning radius) + (turning speed · friction) + (turning radius · friction) | 9         | -33.806       | 88.8                   | 6.201          | 0.011         |

|                                                                                                                                                                                                                                                                                                                                                                                                                                                                                                                                                   |    |         |       |        |       |
|---------------------------------------------------------------------------------------------------------------------------------------------------------------------------------------------------------------------------------------------------------------------------------------------------------------------------------------------------------------------------------------------------------------------------------------------------------------------------------------------------------------------------------------------------|----|---------|-------|--------|-------|
| <b>Full model (ranked 7889<sup>th</sup>)</b> . turning angle +<br>turning speed + turning radius + pre-turn speed +<br>friction + shelter orientation + mass + trial +<br>(turning angle · shelter orientation) +<br>(turning speed · turning radius) +<br>(turning speed · pre-turn speed) +<br>(turning speed · friction) +<br>(turning radius · pre-turn speed) +<br>(turning radius · friction) +<br>(turning radius · shelter orientation) +<br>(pre-turn speed · friction) +<br>(pre-turn speed · shelter orientation) + (friction · trial) | 21 | -46.494 | 155.5 | 72.951 | 4E-17 |
| <b>Null model (ranked 100<sup>th</sup>)</b> . intercept only                                                                                                                                                                                                                                                                                                                                                                                                                                                                                      | 3  | -43.841 | 94.1  | 11.494 | 8E-4  |

$w$  is the Akaike weight, which equals the probability that the model describes the data better than the other models. Only models with an Akaike weight of at least 1% are listed, in addition to the full model and the null model. In addition to their fixed effects, all models contain individual as a random effect. The proportional response variable was *arcsine square root* transformed to approximate a normal distribution.

**Table S6. Ranking of turning angle LMMs based on the likelihood of being the best model.**

| Response: turning angle                                                                                                                                                                                                                                                                                                                                                                               | <i>df</i> | <i>logLik</i> | <i>AIC<sub>C</sub></i> | $\Delta AIC_C$ | <i>w</i> |
|-------------------------------------------------------------------------------------------------------------------------------------------------------------------------------------------------------------------------------------------------------------------------------------------------------------------------------------------------------------------------------------------------------|-----------|---------------|------------------------|----------------|----------|
| <i>Model</i>                                                                                                                                                                                                                                                                                                                                                                                          |           |               |                        |                |          |
| 1. turning speed + turning radius + pre-turn speed + friction + shelter orientation + (turning speed · turning radius) + (turning speed · pre-turn speed) + (turning speed · friction) + (turning radius · pre-turn speed) + (turning radius · friction) + (turning radius · shelter orientation) + (pre-turn speed · friction) + (pre-turn speed · shelter orientation)                              | 16        | -590.222      | 1216.5                 | 0              | 0.198    |
| 2. turning speed + turning radius + pre-turn speed + friction + shelter orientation + trial + (turning speed · turning radius) + (turning speed · pre-turn speed) + (turning speed · friction) + (turning radius · pre-turn speed) + (turning radius · friction) + (turning radius · shelter orientation) + (pre-turn speed · friction) + (pre-turn speed · shelter orientation)                      | 17        | -589.604      | 1217.8                 | 1.307          | 0.103    |
| 3. turning speed + turning radius + pre-turn speed + friction + shelter orientation + mass + (turning speed · turning radius) + (turning speed · pre-turn speed) + (turning speed · friction) + (turning radius · pre-turn speed) + (turning radius · friction) + (turning radius · shelter orientation) + (pre-turn speed · friction) + (pre-turn speed · shelter orientation)                       | 17        | -589.873      | 1218.4                 | 1.844          | 0.079    |
| 4. turning speed + turning radius + pre-turn speed + friction + shelter orientation + trial + (turning speed · turning radius) + (turning speed · pre-turn speed) + (turning speed · friction) + (turning radius · pre-turn speed) + (turning radius · friction) + (turning radius · shelter orientation) + (pre-turn speed · friction) + (pre-turn speed · shelter orientation) + (friction · trial) | 18        | -588.619      | 1218.4                 | 1.917          | 0.076    |
| 5. turning speed + turning radius + pre-turn speed + friction + shelter orientation + mass + trial + (turning speed · turning radius) + (turning speed · pre-turn speed) + (turning speed · friction) + (turning radius · pre-turn speed) +                                                                                                                                                           | 18        | -589.267      | 1219.7                 | 3.213          | 0.040    |

|                       |                                                                                                                                                                                                                                                                                                                                                                                                                                         |    |          |        |       |       |
|-----------------------|-----------------------------------------------------------------------------------------------------------------------------------------------------------------------------------------------------------------------------------------------------------------------------------------------------------------------------------------------------------------------------------------------------------------------------------------|----|----------|--------|-------|-------|
|                       | (turning radius · friction) +<br>(turning radius · shelter orientation) +<br>(pre-turn speed · friction) +<br>(pre-turn speed · shelter orientation)                                                                                                                                                                                                                                                                                    |    |          |        |       |       |
| <b>6. Full model.</b> | turning speed + turning radius +<br>pre-turn speed + friction + shelter orientation +<br>mass + trial + (turning speed · turning radius) +<br>(turning speed · pre-turn speed) +<br>(turning speed · friction) +<br>(turning radius · pre-turn speed) +<br>(turning radius · friction) +<br>(turning radius · shelter orientation) +<br>(pre-turn speed · friction) +<br>(pre-turn speed · shelter orientation) +<br>(friction · trial) | 19 | -588.292 | 1220.4 | 3.883 | 0.028 |
| <b>7.</b>             | turning speed + turning radius + pre-turn speed +<br>friction + shelter orientation +<br>(turning speed · turning radius) +<br>(turning speed · friction) +<br>(turning radius · pre-turn speed) +<br>(turning radius · friction) +<br>(turning radius · shelter orientation) +<br>(pre-turn speed · friction) +<br>(pre-turn speed · shelter orientation)                                                                              | 15 | -593.540 | 1220.6 | 4.133 | 0.025 |
| <b>8.</b>             | turning speed + turning radius + pre-turn speed +<br>friction + shelter orientation +<br>(turning speed · turning radius) +<br>(turning speed · pre-turn speed) +<br>(turning speed · friction) +<br>(turning radius · pre-turn speed) +<br>(turning radius · friction) +<br>(turning radius · shelter orientation) +<br>(pre-turn speed · shelter orientation)                                                                         | 15 | -593.692 | 1221.0 | 4.446 | 0.021 |
| <b>9.</b>             | turning speed + turning radius + pre-turn speed +<br>friction + shelter orientation +<br>(turning speed · pre-turn speed) +<br>(turning speed · friction) +<br>(turning radius · pre-turn speed) +<br>(turning radius · friction) +<br>(turning radius · shelter orientation) +<br>(pre-turn speed · friction) +<br>(pre-turn speed · shelter orientation)                                                                              | 15 | -593.891 | 1221.3 | 4.835 | 0.018 |
| <b>10.</b>            | turning speed + turning radius + pre-turn speed +<br>friction + shelter orientation +<br>(turning speed · turning radius) +<br>(turning speed · pre-turn speed) +<br>(turning speed · friction) +<br>(turning radius · pre-turn speed) +<br>(turning radius · friction) +<br>(turning radius · shelter orientation) +<br>(pre-turn speed · friction)                                                                                    | 15 | -594.041 | 1221.6 | 5.135 | 0.015 |
| <b>11.</b>            | turning speed + turning radius + pre-turn speed +<br>friction + shelter orientation +<br>(turning speed · turning radius) +<br>(turning speed · pre-turn speed) +                                                                                                                                                                                                                                                                       | 15 | -594.107 | 1221.8 | 5.266 | 0.014 |



|            |                                                                                                                                                                                                                                                                                                                                                 |    |          |                                                                                                                                                                                      |       |       |  |  |  |
|------------|-------------------------------------------------------------------------------------------------------------------------------------------------------------------------------------------------------------------------------------------------------------------------------------------------------------------------------------------------|----|----------|--------------------------------------------------------------------------------------------------------------------------------------------------------------------------------------|-------|-------|--|--|--|
|            |                                                                                                                                                                                                                                                                                                                                                 |    |          | (turning speed · friction) +<br>(turning radius · friction) +<br>(turning radius · shelter orientation) +<br>(pre-turn speed · friction) +<br>(pre-turn speed · shelter orientation) |       |       |  |  |  |
| <b>12.</b> | turning speed + turning radius + pre-turn speed + friction + shelter orientation + (turning speed · turning radius) + (turning speed · pre-turn speed) + (turning radius · pre-turn speed) + (turning radius · friction) + (turning radius · shelter orientation) + (pre-turn speed · friction) + (pre-turn speed · shelter orientation)        | 15 | -594.147 | 1221.9                                                                                                                                                                               | 5.346 | 0.014 |  |  |  |
| <b>13.</b> | turning speed + turning radius + pre-turn speed + friction + shelter orientation + (turning speed · turning radius) + (turning speed · pre-turn speed) + (turning speed · friction) + (turning radius · pre-turn speed) + (turning radius · friction) + (pre-turn speed · friction) + (pre-turn speed · shelter orientation)                    | 15 | -594.167 | 1221.9                                                                                                                                                                               | 5.386 | 0.013 |  |  |  |
| <b>14.</b> | turning speed + turning radius + pre-turn speed + friction + shelter orientation + trial + (turning speed · turning radius) + (turning speed · friction) + (turning radius · pre-turn speed) + (turning radius · friction) + (turning radius · shelter orientation) + (pre-turn speed · friction) + (pre-turn speed · shelter orientation)      | 16 | -592.951 | 1222.0                                                                                                                                                                               | 5.460 | 0.013 |  |  |  |
| <b>15.</b> | turning speed + turning radius + pre-turn speed + friction + shelter orientation + trial + (turning speed · turning radius) + (turning speed · pre-turn speed) + (turning speed · friction) + (turning radius · pre-turn speed) + (turning radius · friction) + (turning radius · shelter orientation) + (pre-turn speed · shelter orientation) | 16 | -593.019 | 1222.1                                                                                                                                                                               | 5.595 | 0.012 |  |  |  |
| <b>16.</b> | turning speed + turning radius + pre-turn speed + friction + shelter orientation + mass + (turning speed · turning radius) + (turning speed · friction) + (turning radius · pre-turn speed) + (turning radius · friction) + (turning radius · shelter orientation) + (pre-turn speed · friction) + (pre-turn speed · shelter orientation)       | 16 | -593.176 | 1222.4                                                                                                                                                                               | 5.909 | 0.010 |  |  |  |
| <b>17.</b> | turning speed + turning radius + pre-turn speed + friction + shelter orientation + trial + (turning speed · pre-turn speed) + (turning speed · friction) + (turning radius · pre-turn speed) +                                                                                                                                                  | 16 | -593.185 | 1222.4                                                                                                                                                                               | 5.927 | 0.010 |  |  |  |

(turning radius · friction) +  
(turning radius · shelter orientation) +  
(pre-turn speed · friction) +  
(pre-turn speed · shelter orientation)

**Null model (ranked 2841<sup>st</sup>).** intercept only                      3           -663.310           1332.8           116.280           1E-26

---

$w$  is the Akaike weight, which equals the probability that the model describes the data better than the other models. Only models with an Akaike weight of at least 1% are listed, in addition to the full model and the null model. In addition to their fixed effects, all models contain individual as a random effect.
